# Supplementary material for: Simultaneous quantification of the most common and proteolytic Pseudomonas species in raw milk by multiplex qPCR
Source: PubMed Central journal article supplement (PMC7880948; doi:10.1007/s00253-021-11109-0), 2021-02-01
Supplement: 253_2021_11109_MOESM1_ESM.pdf [file 253_2021_11109_MOESM1_ESM.pdf]

**Journal:** Applied Microbiology and Biotechnology

**Title:** Simultaneous quantification of the most common and proteolytic *Pseudomonas* species in raw milk by multiplex qPCR

**Authors:** Christopher Maier<sup>1</sup>, Katharina Hofmann<sup>1</sup> Christopher Huptas<sup>2</sup>, Siegfried Scherer<sup>1,2</sup>, Mareike Wenning<sup>3</sup>, Genia Lücking<sup>1\*</sup>

<sup>1</sup> ZIEL Institute for Food and Health, Wissenschaftszentrum Weihenstephan, Technische Universität München, Weihenstephaner Berg 1, 85354 Freising, Germany

<sup>2</sup> Lehrstuhl für Mikrobielle Ökologie, Wissenschaftszentrum Weihenstephan, Technische Universität München, Weihenstephaner Berg 3, 85354 Freising, Germany

<sup>3</sup> Bavarian Health and Food Safety Authority (LGL), Veterinärstr. 2, 85764 Oberschleißheim, Germany

\*corresponding author

Corresponding author: Genia Lücking

Email: [genia.luecking@tum.de](mailto:genia.luecking@tum.de)

Tel; 08161 71 2257

## Supplementary Figure

Tree scale : 0.1

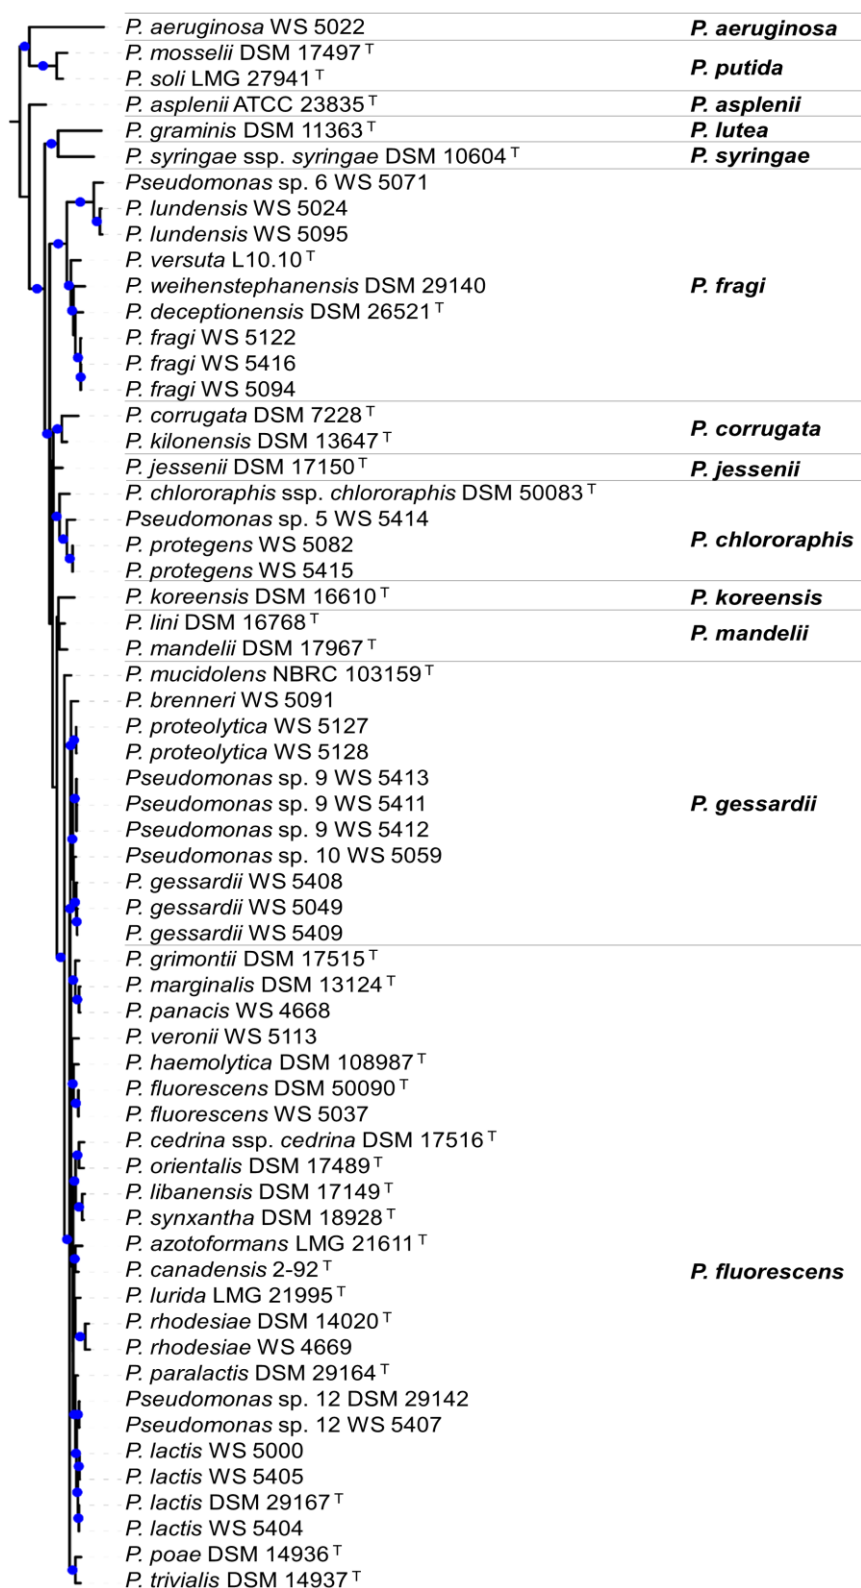

**Fig S1** Rooted *rpoB* gene phylogeny comprising 61 different *Pseudomonas* strains. The tree was reconstructed on the basis of 4,074 alignment positions using the maximum likelihood method and the GTR+G+I nucleotide substitution model. *P. aeruginosa* WS 5022 was used as outgroup. Blue circles indicate branches with high bootstrap support ( $\geq 70\%$  of 500 replicates). The phylogeny was separated in 13 monophyletic groups. Group names are shown in bold next to the tree

## Supplementary Tables

**Table S1** Bacterial strains used for evaluation of the multiplex qPCR assay. Target strains of the five species-specific hydrolysis probes (P1, P2, P3, P4 and P5) are indicated in bold print

| Species                                        | Strain    | Strain collection | Origin                                               |
|------------------------------------------------|-----------|-------------------|------------------------------------------------------|
| <i>Acinetobacter guillouiae</i>                | WS 5457   | WS (TUM)          | raw milk, Germany                                    |
| <i>Acinetobacter johnsonii</i>                 | WS 5458   | WS (TUM)          | raw milk, Germany                                    |
| <i>Acinetobacter junii</i>                     | WS 5459   | WS (TUM)          | environmental monitoring for pharmaceutical industry |
| <i>Aerococcus viridans</i>                     | WS 5460   | WS (TUM)          | raw milk, Germany                                    |
| <i>Arthrobacter casei</i>                      | WS 5462   | WS (TUM)          | Appenzeller cheese, Germany                          |
| <i>Arthrobacter ilicis</i>                     | WS 5461   | WS (TUM)          | environmental monitoring for pharmaceutical industry |
| <i>Bacillus licheniformis</i>                  | DSM 8785  | DSMZ              | miilk, unkown                                        |
| <i>Bifidobacterium longum</i> <sup>†</sup>     | DSM 20219 | DSMZ              | intestine of adult, unkown                           |
| <i>Brevibacterium aurantiacum</i>              | WS 5463   | WS (TUM)          | raw milk, Germany                                    |
| <i>Brevibacterium ptyocampae</i>               | WS 5464   | WS (TUM)          | raw milk, Germany                                    |
| <i>Chryseobacterium haifense</i>               | WS 5465   | WS (TUM)          | raw milk, Germany                                    |
| <i>Citrobacter freundii</i>                    | WS 5466   | WS (TUM)          | dairy product, Germany                               |
| <i>Corynebacterium comporealensis</i>          | WS 5467   | WS (TUM)          | raw milk, Germany                                    |
| <i>Corynebacterium stationis</i>               | WS 5469   | WS (TUM)          | raw milk, Germany                                    |
| <i>Delftia lacustris</i>                       | WS 5470   | WS (TUM)          | raw milk, Germany                                    |
| <i>Enhydrobacter aerosaccus</i>                | WS 5471   | WS (TUM)          | environmental monitoring for pharmaceutical industry |
| <i>Enterobacter cowanii</i>                    | WS 5472   | WS (TUM)          | raw milk, Germany                                    |
| <i>Enterococcus durans</i>                     | WS 5473   | WS (TUM)          | raw milk, Germany                                    |
| <i>Enterococcus italicus</i>                   | WS 5474   | WS (TUM)          | raw milk, Germany                                    |
| <i>Hafnia alvei</i>                            | DSM 30098 | DSMZ              | raw milk, unkown                                     |
| <i>Kocuria kristinae</i>                       | WS 5475   | WS (TUM)          | raw milk, Germany                                    |
| <i>Lactobacillus paracasei</i>                 | WS 5476   | WS (TUM)          | Bauernkäse, Germany                                  |
| <i>Lactococcus garvieae</i>                    | WS 5478   | WS (TUM)          | raw milk, Germany                                    |
| <i>Lactococcus lactis</i>                      | WS 5479   | WS (TUM)          | raw milk, Germany                                    |
| <i>Lactococcus raffinolactis</i> <sup>†</sup>  | DSM 20443 | DSMZ              | raw milk, unkown                                     |
| <i>Leuconostoc lactis</i>                      | WS 5480   | WS (TUM)          | Unknown                                              |
| <i>Microbacterium hominis</i>                  | WS 5481   | WS (TUM)          | raw milk, Germany                                    |
| <i>Pseudoalteromonas haloplanktis</i>          | WS 5482   | WS (TUM)          | dairy product, Germany                               |
| <i>Pseudomonas aeruginosa</i>                  | WS 5022   | WS (TUM)          | raw milk, Germany                                    |
| <i>Pseudomonas alcaligenes</i> <sup>†</sup>    | WS 5013   | DSMZ              | dairy product, Germany                               |
| <i>Pseudomonas asplenii</i> <sup>†</sup>       | DSM 17133 | DSMZ              | bird's nest fern <i>Asplenium nidus</i> , USA        |
| <i>Pseudomonas brenneri</i>                    | WS 5091   | DSMZ              | raw milk, Germany                                    |
| <i>Pseudomonas canadensis</i> <sup>†</sup>     | LMG 28499 | LMG               | Soil, Woodslee, Ontario Canada                       |
| <i>Pseudomonas cedrina</i> <sup>†</sup>        | DSM 17516 | DSMZ              | spring water, Lebanon                                |
| <i>Pseudomonas chengduensis</i> <sup>†</sup>   | DSM 26382 | DSMZ              | waste disposal site, China                           |
| <i>Pseudomonas chlororaphis</i> <sup>†</sup>   | DSM 50083 | DSMZ              | plate contaminant, unkown                            |
| <i>Pseudomonas corrugata</i> <sup>†</sup>      | DSM 7228  | DSMZ              | <i>Lycopersicon esculentum</i> , UK                  |
| <i>Pseudomonas deceptionensis</i> <sup>†</sup> | DSM 26521 | DSMZ              | marine sediment, Antarctica                          |

| Species                                                | Strain           | Strain collection | Origin                                          |
|--------------------------------------------------------|------------------|-------------------|-------------------------------------------------|
| <i>Pseudomonas endophytica</i>                         | WS 5129          | WS (TUM)          | stem tissue of <i>Solanum tuberosum</i> , Spain |
| <i>Pseudomonas extremaustralis</i> <sup>T</sup>        | DSM 17835        | DSMZ              | water pond, Antarctica                          |
| <b><i>Pseudomonas fluorescens</i></b> <sup>P2</sup>    | <b>WS 5037</b>   | WS (TUM)          | raw milk, Germany                               |
| <b><i>Pseudomonas fluorescens</i></b> <sup>T, P2</sup> | <b>DSM 50090</b> | WS (TUM)          | Pre-filter tanks, UK                            |
| <b><i>Pseudomonas fragi</i></b> <sup>P4</sup>          | <b>WS 5094</b>   | WS (TUM)          | raw milk, Germany                               |
| <b><i>Pseudomonas fragi</i></b> <sup>P4</sup>          | <b>WS 5112</b>   | WS (TUM)          | raw milk, Germany                               |
| <b><i>Pseudomonas fragi</i></b> <sup>P4</sup>          | <b>WS 5416</b>   | WS (TUM)          | raw milk, Germany                               |
| <b><i>Pseudomonas gessardii</i></b> <sup>P1</sup>      | <b>WS 5049</b>   | WS (TUM)          | raw milk, Germany                               |
| <b><i>Pseudomonas gessardii</i></b> <sup>P1</sup>      | <b>WS 5408</b>   | WS (TUM)          | raw milk, Germany                               |
| <b><i>Pseudomonas gessardii</i></b> <sup>P1</sup>      | <b>WS 5409</b>   | WS (TUM)          | hok 070719-16-1                                 |
| <i>Pseudomonas graminis</i>                            | DSM 100941       | DSMZ              | cleanroom facility, France                      |
| <i>Pseudomonas grimontii</i> <sup>T</sup>              | DSM 17515        | DSMZ              | mineral water, France                           |
| <i>Pseudomonas haemolytica</i> <sup>T</sup>            | DSM 108987       | DSMZ              | raw milk, Germany                               |
| <i>Pseudomonas helleri</i> <sup>T</sup>                | DSM 29165        | DSMZ              | raw milk, Germany                               |
| <i>Pseudomonas jessenii</i>                            | DSM 10315        | DSMZ              | soil, Germany, Konstanz                         |
| <i>Pseudomonas jessenii</i>                            | WS 5418          | WS (TUM)          | raw milk, Germany                               |
| <i>Pseudomonas kilonensis</i> <sup>T</sup>             | DSM 13647        | DSMZ              | agricultural soil, Germany                      |
| <i>Pseudomonas koreensis</i> <sup>T</sup>              | DSM 16610        | DSMZ              | agricultural soil, Korea                        |
| <b><i>Pseudomonas lactis</i></b> <sup>P2</sup>         | <b>WS 5404</b>   | WS (TUM)          | raw milk, Germany                               |
| <b><i>Pseudomonas lactis</i></b> <sup>P2</sup>         | <b>WS 5405</b>   | WS (TUM)          | raw milk, Germany                               |
| <b><i>Pseudomonas lactis</i></b> <sup>P2</sup>         | <b>WS 5000</b>   | WS (TUM)          | raw milk, Germany                               |
| <b><i>Pseudomonas lactis</i></b> <sup>T, P2</sup>      | <b>DSM 29167</b> | DSMZ              | raw milk, Germany                               |
| <i>Pseudomonas libanensis</i> <sup>T</sup>             | DSM 17149        | DSMZ              | spring water, Lebanon                           |
| <i>Pseudomonas lini</i> <sup>T</sup>                   | DSM 16768        | DSMZ              | rhizospheric soil, France                       |
| <b><i>Pseudomonas lundensis</i></b> <sup>P5</sup>      | <b>WS 5024</b>   | WS (TUM)          | raw milk, Germany                               |
| <b><i>Pseudomonas lundensis</i></b> <sup>P5</sup>      | <b>WS 5095</b>   | WS (TUM)          | raw milk, Germany                               |
| <i>Pseudomonas mandelii</i> <sup>T</sup>               | DSM 17967        | DSMZ              | mineral water, France                           |
| <i>Pseudomonas marginalis</i>                          | DSM 13124        | DSMZ              | <i>Cichorium intybus</i> , USA                  |
| <i>Pseudomonas mosselii</i> <sup>T</sup>               | DSM 17497        | DSMZ              | medical specimen, France                        |
| <i>Pseudomonas mucidolens</i>                          | WS 5456          | WS (TUM)          | raw milk, Germany                               |
| <i>Pseudomonas nitroreducens</i> <sup>T</sup>          | DSM 14399        | WS (TUM)          | oil-brine, Japan                                |
| <i>Pseudomonas orientalis</i> <sup>T</sup>             | DSM 17489        | DSMZ              | spring water, Lebanon                           |
| <i>Pseudomonas oryzihabitans</i>                       | WS 5017          | WS (TUM)          | unknown, Germany                                |
| <i>Pseudomonas oryzihabitans</i> <sup>T</sup>          | DSM 6835         | DSMZ              | rice paddy, Japan                               |
| <i>Pseudomonas panacis</i>                             | WS 4668          | WS (TUM)          | raw milk, Germany                               |
| <i>Pseudomonas paralactis</i> <sup>T</sup>             | DSM 29164        | DSMZ              | raw milk, Germany                               |
| <i>Pseudomonas peli</i> <sup>T</sup>                   | DSM 17833        | DSMZ              | nitrifying enrichment culture, Belgium          |
| <i>Pseudomonas poae</i> <sup>T</sup>                   | DSM 14936        | DSMZ              | phyllosphere of grasses, Germany                |
| <b><i>Pseudomonas protegens</i></b> <sup>P3</sup>      | <b>WS 5082</b>   | WS (TUM)          | raw milk, Germany                               |
| <b><i>Pseudomonas protegens</i></b> <sup>P3</sup>      | <b>WS 5415</b>   | WS (TUM)          | raw milk, Germany                               |
| <b><i>Pseudomonas proteolytica</i></b> <sup>P1</sup>   | <b>WS 5127</b>   | WS (TUM)          | raw milk, Germany                               |
| <b><i>Pseudomonas proteolytica</i></b> <sup>P1</sup>   | <b>WS 5128</b>   | WS (TUM)          | raw milk, Germany                               |
| <i>Pseudomonas psychrophila</i> <sup>T</sup>           | DSM 17535        | DSMZ              | coldroom for food storage, Japan                |

| Species                                                         | Strain           | Strain collection | Origin                                                                  |
|-----------------------------------------------------------------|------------------|-------------------|-------------------------------------------------------------------------|
| <i>Pseudomonas psychrotolerans</i> <sup>†</sup>                 | DSM 15758        | DSMZ              | water under a dog's cage in a Medical Clinic for Small Animals, Austria |
| <i>Pseudomonas rhodesiae</i> <sup>†</sup>                       | DSM 14020        | DSMZ              | mineral water, France                                                   |
| <i>Pseudomonas saxonica</i>                                     | DSM 108990       | DSMZ              | raw milk, Germany                                                       |
| <i>Pseudomonas saxonica</i> <sup>†</sup>                        | DSM 108989       | DSMZ              | raw milk, Germany                                                       |
| <i>Pseudomonas soli</i> <sup>†</sup>                            | DSM 28043        | DSMZ              | soil, Spain                                                             |
| <b><i>Pseudomonas</i> sp. 5</b> <sup>P3</sup>                   | <b>WS 5414</b>   | WS (TUM)          | raw milk, Germany                                                       |
| <b><i>Pseudomonas</i> sp. 6</b> <sup>P5</sup>                   | <b>WS 5071</b>   | WS (TUM)          | raw milk, Germany                                                       |
| <b><i>Pseudomonas</i> sp. 9</b> <sup>P1</sup>                   | <b>WS 5411</b>   | WS (TUM)          | raw milk, Germany                                                       |
| <b><i>Pseudomonas</i> sp. 9</b> <sup>P1</sup>                   | <b>WS 5412</b>   | WS (TUM)          | raw milk, Germany                                                       |
| <b><i>Pseudomonas</i> sp. 9</b> <sup>P1</sup>                   | <b>WS 5413</b>   | WS (TUM)          | raw milk, Germany                                                       |
| <b><i>Pseudomonas</i> sp. 10</b> <sup>P1</sup>                  | <b>WS 5059</b>   | WS (TUM)          | raw milk, Germany                                                       |
| <b><i>Pseudomonas</i> sp. 12</b> <sup>P2</sup>                  | <b>WS 5407</b>   | WS (TUM)          | raw milk, Germany                                                       |
| <b><i>Pseudomonas</i> sp. 12</b> <sup>P2</sup>                  | <b>DSM 29142</b> | DSMZ              | raw milk, Germany                                                       |
| <i>Pseudomonas stutzeri</i>                                     | WS 5018          | WS (TUM)          | environmental monitoring for pharmaceutical industry                    |
| <i>Pseudomonas synxantha</i> <sup>†</sup>                       | DSM 18928        | DSMZ              | cream, USA                                                              |
| <i>Pseudomonas syringae</i>                                     | LMG 5141         | DSMZ              | <i>Cucumis sativus</i> , USA                                            |
| <i>Pseudomonas syringae</i> subsp. <i>Syringae</i> <sup>†</sup> | DSM 10604        | DSMZ              | <i>Syringa vulgaris</i> , UK                                            |
| <i>Pseudomonas taetrolens</i> <sup>†</sup>                      | DSM 21104        | DSMZ              | musty egg, unknown                                                      |
| <i>Pseudomonas trivialis</i> <sup>†</sup>                       | DSM 14937        | DSMZ              | phyllosphere of grasses, Germany                                        |
| <i>Pseudomonas veronii</i>                                      | WS 5113          | WS (TUM)          | raw milk, Germany                                                       |
| <i>Pseudomonas versuta</i> <sup>†</sup>                         | DSM 101070       | DSMZ              | Soil, Antarctica, Lagoon Island                                         |
| <i>Pseudomonas weihenstephanensis</i>                           | DSM 29140        | DSMZ              | raw milk, Germany                                                       |
| <i>Psychrobacter alimentarius</i>                               | WS 5483          | WS (TUM)          | dairy product, Germany                                                  |
| <i>Psychrobacter psychrophilus</i>                              | WS 5484          | WS (TUM)          | air, Germany                                                            |
| <i>Serratia liquefaciens</i>                                    | DSM 30065        | DSMZ              | raw milk, unknown                                                       |
| <i>Staphylococcus agnetis</i>                                   | WS 5485          | WS (TUM)          | raw milk, Germany                                                       |
| <i>Staphylococcus chromogenes</i>                               | WS 5486          | WS (TUM)          | raw milk, Germany                                                       |
| <i>Staphylococcus haemolyticus</i>                              | WS 5488          | WS (TUM)          | raw milk, Germany                                                       |
| <i>Staphylococcus sciuri</i>                                    | WS 5489          | WS (TUM)          | raw milk, Germany                                                       |
| <i>Stenotrophomonas maltophilia</i>                             | WS 5490          | WS (TUM)          | dairy product, Germany                                                  |
| <i>Stenotrophomonas rhizophila</i>                              | WS 5491          | WS (TUM)          | Fish delicacies, Germany                                                |
| <i>Streptococcus equinus</i>                                    | WS 5487          | WS (TUM)          | raw milk, Germany                                                       |
| <i>Streptococcus mitis</i> <sup>†</sup>                         | DSM 12643        | DSMZ              | oral cavity, human, unknown                                             |
| <i>Streptococcus pyogenes</i>                                   | DSM 2071         | DSMZ              | human isolate, unknown                                                  |

<sup>†</sup>: type strains

<sup>P1-5</sup>: target strain of probe P1-P5

**Table S2** Genome data of 61 *Pseudomonas* strains from NCBI used for the construction of *rpoB*- and *aprX*-phylogenetic trees und for primer and probe design

| Strain                                                                 | NCBI WGS ID | RefSeq/GenBank IDs |
|------------------------------------------------------------------------|-------------|--------------------|
| <i>P. aeruginosa</i> WS 5022                                           | JAAQZH01    |                    |
| <i>P. asplenii</i> ATCC 23835 <sup>T</sup>                             |             | LT629777.1         |
| <i>P. azotoformans</i> LMG 21611 <sup>T</sup>                          |             | NZ_LT629702.1      |
| <i>P. brenneri</i> WS 5091                                             | JAAQZG01    |                    |
| <i>P. canadensis</i> 2-92 <sup>T</sup>                                 | AYTD01      |                    |
| <i>P. cedrina</i> ssp. <i>cedrina</i> DSM 17516 <sup>T</sup>           | MNPW01      |                    |
| <i>P. chlororaphis</i> ssp. <i>chlororaphis</i> DSM 50083 <sup>T</sup> | VFIN01      |                    |
| <i>P. corrugata</i> DSM 7228 <sup>T</sup>                              | LHVK01      |                    |
| <i>P. deceptionensis</i> DSM 26521 <sup>T</sup>                        | JYKX01      |                    |
| <i>P. fluorescens</i> WS 5037                                          | JAAQZD01    |                    |
| <i>P. fluorescens</i> DSM 50090 <sup>T</sup>                           | VFEP01      |                    |
| <i>P. fragi</i> WS 5094                                                | JAAQYX01    |                    |
| <i>P. fragi</i> WS 5112                                                | JAAQYV01    |                    |
| <i>P. fragi</i> WS 5416                                                | JAAQYQ01    |                    |
| <i>P. gessardii</i> WS 5409                                            | JAAQYP01    |                    |
| <i>P. gessardii</i> WS 5049                                            | JAAQYO01    |                    |
| <i>P. gessardii</i> WS 5408                                            | JAAQYN01    |                    |
| <i>P. graminis</i> DSM 11363 <sup>T</sup>                              | FOHW01      |                    |
| <i>P. grimontii</i> DSM 17515 <sup>T</sup>                             | VFES01      |                    |
| <i>P. haemolytica</i> DSM 108987 <sup>T</sup>                          | VOIW01      |                    |
| <i>P. jessenii</i> DSM 17150 <sup>T</sup>                              | NIWT01      |                    |
| <i>P. kilonensis</i> DSM 13647 <sup>T</sup>                            | LHVH01      |                    |
| <i>P. koreensis</i> DSM 16610 <sup>T</sup>                             | JAAQYM01    |                    |
| <i>P. lactis</i> WS 5000                                               | JAAQYJ01    |                    |
| <i>P. lactis</i> WS 5404                                               | JAAQYI01    |                    |
| <i>P. lactis</i> WS 5405                                               | JAAQYH01    |                    |
| <i>P. lactis</i> DSM 29167 <sup>T</sup>                                | JYLO01      |                    |
| <i>P. libanensis</i> DSM 17149 <sup>T</sup>                            | JY LH01     |                    |
| <i>P. lini</i> DSM 16768 <sup>T</sup>                                  | JYLB01      |                    |
| <i>P. lundensis</i> WS 5024                                            | JAAQYG01    |                    |
| <i>P. lundensis</i> WS 5095                                            | JAAQYC01    |                    |
| <i>P. lurida</i> LMG 21995 <sup>T</sup>                                | PDJB01      |                    |
| <i>P. mandelii</i> DSM 17967 <sup>T</sup>                              | VFIM01      |                    |
| <i>P. marginalis</i> DSM 13124 <sup>T</sup>                            | VFEQ01      |                    |
| <i>P. mosselii</i> DSM 17497 <sup>T</sup>                              | JHYW01      |                    |
| <i>P. mucidolens</i> NBRC 103159 <sup>T</sup>                          | BDAH01      |                    |
| <i>P. orientalis</i> DSM 17489 <sup>T</sup>                            | JYLM01      |                    |
| <i>P. panacis</i> WS 4668                                              | JAARME01    |                    |
| <i>P. paralactis</i> DSM 29164 <sup>T</sup>                            | JYLN01      |                    |
| <i>P. poae</i> DSM 14936 <sup>T</sup>                                  | JYLI01      |                    |
| <i>P. protegens</i> WS 5082                                            | JAARMD01    |                    |
| <i>P. protegens</i> WS 5415                                            | JAAQXO01    |                    |
| <i>P. proteolytica</i> WS 5127                                         | JAAQXK01    |                    |
| <i>P. proteolytica</i> WS 5128                                         | JAAQXJ01    |                    |
| <i>P. rhodesiae</i> WS 4669                                            | JAAQXF01    |                    |
| <i>P. rhodesiae</i> DSM 14020 <sup>T</sup>                             | VFEU01      |                    |
| <i>P. soli</i> LMG 27941 <sup>T</sup>                                  | FOEQ01      |                    |
| <i>Pseudomonas</i> sp. 5 WS 5414                                       | JAAQWZ01    |                    |
| <i>Pseudomonas</i> sp. 6 WS 5071                                       | JAAQWY01    |                    |
| <i>Pseudomonas</i> sp. 9 WS 5411                                       | JAARMC01    |                    |
| <i>Pseudomonas</i> sp. 9 WS 5412                                       | JAARMB01    |                    |
| <i>Pseudomonas</i> sp. 9 WS 5413                                       | JAAQWR01    |                    |
| <i>Pseudomonas</i> sp. 10 WS 5059                                      | JAAQWO01    |                    |
| <i>Pseudomonas</i> sp. 12 DSM 29142                                    | JYLP01      |                    |
| <i>Pseudomonas</i> sp. 12 WS 5407                                      | JAAQWJ01    |                    |

| Strain                                                         | NCBI WGS ID | RefSeq/GenBank IDs |
|----------------------------------------------------------------|-------------|--------------------|
| <i>P. synxantha</i> DSM 18928 <sup>†</sup>                     | JY LJ01     |                    |
| <i>P. syringae</i> ssp. <i>syringae</i> DSM 10604 <sup>†</sup> | JAL K01     |                    |
| <i>P. trivialis</i> DSM 14937 <sup>†</sup>                     | JY LK01     |                    |
| <i>P. veronii</i> WS 5113                                      | JAA QWD01   |                    |
| <i>P. versuta</i> L10.10 <sup>†</sup>                          |             | NZ_CP012676.1      |
| <i>P. weihenstephanensis</i> DSM 29140                         | JY LG01     |                    |

<sup>†</sup>: type strain

**Table S3** Composition of six different DNA-pools used as templates in single- and multiplex qPCR. Every DNA-pool (pool 1-6) contains equal DNA amounts of five different strains, each representing a target for one species-specific probe (P1-P5)

| Probe | Species                   | Strain    | Pool 1 | Pool 2 | Pool3 | Pool 4 | Pool 5 | Pool 6 |
|-------|---------------------------|-----------|--------|--------|-------|--------|--------|--------|
| P1    | <i>P. proteolytica</i>    | WS 5127   | X      |        |       |        |        |        |
|       | <i>P. proteolytica</i>    | WS 5128   |        | X      |       |        |        |        |
|       | <i>P. gessardii</i>       | WS 5408   |        |        | X     |        |        |        |
|       | <i>P. gessardii</i>       | WS 5049   |        |        |       | X      |        |        |
|       | <i>Pseudomonas</i> sp. 9  | WS 5413   |        |        |       |        | X      |        |
|       | <i>Pseudomonas</i> sp. 9  | WS 5411   |        |        |       |        |        | X      |
| P2    | <i>P. lactis</i>          | WS 5404   | X      |        |       |        |        |        |
|       | <i>P. lactis</i>          | DSM 29167 |        | X      |       |        |        |        |
|       | <i>P. fluorescens</i>     | WS 5037   |        |        | X     |        |        |        |
|       | <i>P. fluorescens</i>     | DSM 50090 |        |        |       | X      |        |        |
|       | <i>Pseudomonas</i> sp. 12 | WS 5407   |        |        |       |        | X      |        |
|       | <i>Pseudomonas</i> sp. 12 | DSM 29142 |        |        |       |        |        | X      |
| P3    | <i>Pseudomonas</i> sp. 5  | WS 5414   | X      |        | X     |        | X      |        |
|       | <i>P. protegens</i>       | WS 5082   |        | X      |       | X      |        | X      |
| P4    | <i>P. fragi</i>           | WS 5416   | X      |        | X     |        | X      |        |
|       | <i>P. fragi</i>           | WS 5112   |        | X      |       | X      |        | X      |
| P5    | <i>P. lundensis</i>       | WS 5095   | X      |        | X     |        | X      |        |
|       | <i>P. lundensis</i>       | WS 5024   |        | X      |       | X      |        | X      |

**Table S4** C<sub>q</sub>-values from multiplex qPCR assays, applying the six *Pseudomonas* hydrolysis probes (P1-P6) and DNA (0.1-0.2 ng/μl final concentration) from 49 *Pseudomonas* strains from 45 non-target species and isolates of 40 other bacterial species. Mean values of two technical replicates per measurement are shown. Hyphens (-) represent no signal in qPCR. C<sub>q</sub>-values above the defined threshold of 33 were considered as not quantifiable and are given in brackets

| Species and strain                                     | P1 | P2 | P3 | P4 | P5 | P6    |
|--------------------------------------------------------|----|----|----|----|----|-------|
| <b>Non-target pseudomonads</b>                         |    |    |    |    |    |       |
| <i>Pseudomonas aeruginosa</i> WS 5022                  | -  | -  | -  | -  | -  | 22.69 |
| <i>Pseudomonas alcaligenes</i> WS 5013                 | -  | -  | -  | -  | -  | 20.82 |
| <i>Pseudomonas asplenii</i> DSM 17133 <sup>†</sup>     | -  | -  | -  | -  | -  | 19.13 |
| <i>Pseudomonas brenneri</i> WS 5091                    | -  | -  | -  | -  | -  | 18.51 |
| <i>Pseudomonas canadensis</i> LMG 28499 <sup>†</sup>   | -  | -  | -  | -  | -  | 20.08 |
| <i>Pseudomonas cedrina</i> DSM 17516 <sup>†</sup>      | -  | -  | -  | -  | -  | 20.35 |
| <i>Pseudomonas chengduensis</i> DSM 26382 <sup>†</sup> | -  | -  | -  | -  | -  | 22.63 |

| <b>Species and strain</b>                                                 | <b>P1</b> | <b>P2</b> | <b>P3</b> | <b>P4</b> | <b>P5</b> | <b>P6</b> |
|---------------------------------------------------------------------------|-----------|-----------|-----------|-----------|-----------|-----------|
| <i>Pseudomonas chlororaphis</i> DSM 50083 <sup>†</sup>                    | -         | -         | -         | -         | -         | 20.60     |
| <i>Pseudomonas corrugata</i> DSM 7228 <sup>†</sup>                        | -         | -         | -         | -         | -         | 19.92     |
| <i>Pseudomonas deceptionensis</i> DSM 26521 <sup>†</sup>                  | -         | -         | -         | -         | -         | 19.93     |
| <i>Pseudomonas endophytica</i> WS 5129                                    | -         | -         | -         | -         | -         | 19.97     |
| <i>Pseudomonas extremaustralis</i> DSM 17835 <sup>†</sup>                 | -         | -         | -         | -         | -         | 18.64     |
| <i>Pseudomonas graminis</i> DSM 100941                                    | -         | -         | -         | -         | -         | 22.63     |
| <i>Pseudomonas grimontii</i> DSM 17515 <sup>†</sup>                       | 32.13     | -         | -         | -         | -         | 18.79     |
| <i>Pseudomonas haemolytica</i> DSM 108987 <sup>†</sup>                    | -         | 26.00     | -         | -         | -         | 20.43     |
| <i>Pseudomonas helleri</i> DSM 29165 <sup>†</sup>                         | -         | -         | -         | -         | -         | 20.00     |
| <i>Pseudomonas jessenii</i> DSM10315                                      | -         | -         | -         | -         | -         | 18.24     |
| <i>Pseudomonas jessenii</i> WS 5418                                       | -         | -         | -         | -         | -         | 19.09     |
| <i>Pseudomonas kilonensis</i> DSM 13647 <sup>†</sup>                      | -         | -         | -         | -         | -         | 20.05     |
| <i>Pseudomonas koreensis</i> DSM 16610 <sup>†</sup>                       | -         | -         | -         | -         | -         | 19.01     |
| <i>Pseudomonas libanensis</i> DSM 17149 <sup>†</sup>                      | -         | -         | -         | -         | -         | 20.07     |
| <i>Pseudomonas lini</i> DSM 16768 <sup>†</sup>                            | -         | -         | -         | -         | -         | 18.64     |
| <i>Pseudomonas mandelii</i> DSM 17967 <sup>†</sup>                        | -         | -         | -         | -         | -         | 17.45     |
| <i>Pseudomonas marginalis</i> DSM 13124                                   | 32.12     | -         | -         | -         | -         | 18.73     |
| <i>Pseudomonas mosselii</i> DSM 17497 <sup>†</sup>                        | -         | -         | -         | -         | -         | 21.81     |
| <i>Pseudomonas mucidolens</i> WS 5456                                     | -         | -         | -         | -         | -         | 20.32     |
| <i>Pseudomonas nitroreducens</i> DSM 14399 <sup>†</sup>                   | -         | -         | -         | -         | -         | 21.38     |
| <i>Pseudomonas orientalis</i> DSM 17489 <sup>†</sup>                      | -         | 24.45     | -         | -         | -         | 18.81     |
| <i>Pseudomonas oryzihabitans</i> DSM 6835 <sup>†</sup>                    | -         | -         | -         | -         | -         | 18.70     |
| <i>Pseudomonas oryzihabitans</i> WS 5017                                  | -         | -         | -         | -         | -         | 18.62     |
| <i>Pseudomonas panacis</i> WS 4668                                        | -         | -         | -         | -         | -         | 20.16     |
| <i>Pseudomonas paralactis</i> DSM 29164 <sup>†</sup>                      | -         | 24.44     | -         | -         | -         | 18.74     |
| <i>Pseudomonas peli</i> DSM 17833 <sup>†</sup>                            | -         | -         | -         | -         | -         | 20.06     |
| <i>Pseudomonas poae</i> DSM 14936 <sup>†</sup>                            | -         | (33.31)   | -         | -         | -         | 19.77     |
| <i>Pseudomonas psychrophila</i> DSM 17535 <sup>†</sup>                    | -         | -         | -         | -         | -         | 18.14     |
| <i>Pseudomonas psychrotolerans</i> DSM 15758 <sup>†</sup>                 | -         | -         | -         | -         | -         | 18.49     |
| <i>Pseudomonas rhodesiae</i> DSM 14020 <sup>†</sup>                       | -         | -         | -         | -         | -         | 20.62     |
| <i>Pseudomonas saxonica</i> DSM 108989 <sup>†</sup>                       | -         | -         | -         | -         | -         | 19.97     |
| <i>Pseudomonas saxonica</i> DSM 108990                                    | -         | -         | -         | -         | -         | 19.69     |
| <i>Pseudomonas soli</i> DSM 28043 <sup>†</sup>                            | -         | -         | -         | -         | -         | 22.53     |
| <i>Pseudomonas stutzeri</i> WS 5018                                       | -         | -         | -         | -         | -         | 27.13     |
| <i>Pseudomonas synxantha</i> DSM 18928 <sup>†</sup>                       | -         | 27.61     | -         | -         | -         | 19.82     |
| <i>Pseudomonas syringae</i> LMG 5141                                      | -         | -         | -         | -         | -         | 20.19     |
| <i>Pseudomonas syringae</i> subsp. <i>Syringae</i> DSM 10604 <sup>†</sup> | -         | -         | -         | -         | -         | 20.29     |
| <i>Pseudomonas taetrolens</i> DSM 21104 <sup>†</sup>                      | -         | -         | -         | -         | -         | 18.02     |
| <i>Pseudomonas trivialis</i> DSM 14937 <sup>†</sup>                       | (33.27)   | (34.19)   | -         | -         | -         | 18.21     |
| <i>Pseudomonas veronii</i> WS 5113                                        | -         | -         | -         | -         | -         | 19.72     |
| <i>Pseudomonas versuta</i> DSM 101070 <sup>†</sup>                        | -         | -         | -         | -         | -         | 19.96     |
| <i>Pseudomonas weihenstephanensis</i> DSM 29140                           | -         | -         | -         | -         | -         | 19.7      |



| Species and strain                                      | P1           | P2 | P3 | P4 | P5 | P6           |
|---------------------------------------------------------|--------------|----|----|----|----|--------------|
| <b>Other bacteria</b>                                   |              |    |    |    |    |              |
| <i>Acinetobacter guillouiae</i> WS 5457                 | -            | -  | -  | -  | -  | (33.70)      |
| <i>Acinetobacter johnsonii</i> WS 5458                  | -            | -  | -  | -  | -  | (33.84)      |
| <i>Acinetobacter junii</i> WS 5459                      | (34.87)      | -  | -  | -  | -  | -            |
| <i>Aerococcus viridans</i> WS 5460                      | (33.23)      | -  | -  | -  | -  | -            |
| <i>Arthrobacter casei</i> WS 5462                       | -            | -  | -  | -  | -  | -            |
| <i>Arthrobacter ilicis</i> WS 5461                      | -            | -  | -  | -  | -  | -            |
| <i>Bacillus licheniformis</i> DSM 8785                  | -            | -  | -  | -  | -  | -            |
| <i>Bifidobacterium longum</i> DSM 20219 <sup>†</sup>    | -            | -  | -  | -  | -  | -            |
| <i>Brevibacterium aurantiacum</i> WS 5463               | -            | -  | -  | -  | -  | -            |
| <i>Brevibacterium ptyocampae</i> WS 5464                | -            | -  | -  | -  | -  | (33.99)      |
| <i>Chryseobacterium haifense</i> WS 5465                | -            | -  | -  | -  | -  | -            |
| <i>Citrobacter freundii</i> WS 5466                     | -            | -  | -  | -  | -  | <b>30.96</b> |
| <i>Corynebacterium comporealensis</i> WS 5467           | -            | -  | -  | -  | -  | -            |
| <i>Corynebacterium stationis</i> WS 5469                | -            | -  | -  | -  | -  | -            |
| <i>Delftia lacustris</i> WS 5470                        | (33.31)      | -  | -  | -  | -  | <b>32.91</b> |
| <i>Enhydrobacter aerosaccus</i> WS 5471                 | -            | -  | -  | -  | -  | (33.46)      |
| <i>Enterobacter cowanii</i> WS 5472                     | -            | -  | -  | -  | -  | -            |
| <i>Enterococcus durans</i> WS 5473                      | -            | -  | -  | -  | -  | -            |
| <i>Enterococcus italicus</i> WS 5474                    | -            | -  | -  | -  | -  | -            |
| <i>Hafnia alvei</i> DSM 30098                           | -            | -  | -  | -  | -  | <b>32.47</b> |
| <i>Kocuria kristinae</i> WS 5475                        | -            | -  | -  | -  | -  | -            |
| <i>Lactobacillus paracasei</i> WS 5476                  | -            | -  | -  | -  | -  | -            |
| <i>Lactococcus garvieae</i> WS 5478                     | -            | -  | -  | -  | -  | -            |
| <i>Lactococcus lactis</i> WS 5479                       | -            | -  | -  | -  | -  | -            |
| <i>Lactococcus raffinolactis</i> DSM 20443 <sup>†</sup> | -            | -  | -  | -  | -  | -            |
| <i>Leuconostoc lactis</i> WS 5480                       | (33.90)      | -  | -  | -  | -  | -            |
| <i>Microbacterium hominis</i> WS 5481                   | -            | -  | -  | -  | -  | -            |
| <i>Pseudoalteromonas haloplanktis</i> WS 5482           | -            | -  | -  | -  | -  | <b>29.61</b> |
| <i>Psychrobacter alimentarius</i> WS 5483               | -            | -  | -  | -  | -  | -            |
| <i>Psychrobacter psychrophilus</i> WS 5484              | (34.37)      | -  | -  | -  | -  | -            |
| <i>Serratia liquefaciens</i> DSM 30065                  | -            | -  | -  | -  | -  | <b>32.76</b> |
| <i>Staphylococcus agnetis</i> WS 5485                   | -            | -  | -  | -  | -  | -            |
| <i>Staphylococcus chromogenes</i> WS 5486               | (34.29)      | -  | -  | -  | -  | -            |
| <i>Staphylococcus haemolyticus</i> WS 5488              | -            | -  | -  | -  | -  | -            |
| <i>Staphylococcus sciuri</i> WS 5489                    | (34.87)      | -  | -  | -  | -  | -            |
| <i>Stenotrophomonas maltophilia</i> WS 5490             | -            | -  | -  | -  | -  | -            |
| <i>Stenotrophomonas rhizophila</i> WS 5491              | -            | -  | -  | -  | -  | -            |
| <i>Streptococcus equinus</i> WS 5487                    | (34.58)      | -  | -  | -  | -  | -            |
| <i>Streptococcus mitis</i> DSM 12643 <sup>†</sup>       | -            | -  | -  | -  | -  | -            |
| <i>Streptococcus pyogenes</i> DSM 2071                  | <b>32.91</b> | -  | -  | -  | -  | -            |

<sup>†</sup>: type strains

**Table S5** Total- and *Pseudomonas* cell counts of 60 industrial raw milk samples, determined by cultivation on TSA and CFC agar, respectively. ND: not determined

| Raw milk sample | Total cell count | <i>Pseudomonas</i> cell count | <i>Pseudomonas</i> / total count [%] |
|-----------------|------------------|-------------------------------|--------------------------------------|
| 1               | 1.10E+07         | 9.50E+06                      | 86.7                                 |
| 2               | >1.00E+08        | 2.00E+07                      | ND                                   |
| 3               | 1.20E+07         | 5.95E+06                      | 49.6                                 |
| 4               | 2.00E+07         | 2.00E+07                      | 100.0                                |
| 5               | >1.00E+08        | 1.07E+07                      | ND                                   |
| 6               | >1.00E+08        | 1.16E+07                      | ND                                   |
| 7               | 7.00E+06         | 5.00E+06                      | 71.4                                 |
| 8               | 2.00E+07         | 3.59E+06                      | 18.0                                 |
| 9               | 6.51E+05         | 5.05E+05                      | 77.5                                 |
| 10              | 3.17E+06         | 1.46E+06                      | 46.1                                 |
| 11              | 1.29E+06         | 8.20E+05                      | 63.6                                 |
| 12              | 6.23E+06         | 2.84E+06                      | 45.6                                 |
| 13              | >1.00E+08        | 3.24E+06                      | ND                                   |
| 14              | 4.30E+05         | 5.10E+05                      | 118.6                                |
| 15              | 1.75E+05         | 2.07E+05                      | 118.1                                |
| 16              | >1.00E+05        | 3.86E+05                      | ND                                   |
| 17              | 6.88E+05         | 4.46E+05                      | 64.9                                 |
| 18              | 1.87E+05         | 1.59E+05                      | 85.0                                 |
| 19              | 3.80E+04         | 2.84E+04                      | 74.6                                 |
| 20              | 1.36E+05         | 5.44E+04                      | 40.0                                 |
| 21              | 1.92E+06         | 2.62E+05                      | 13.6                                 |
| 22              | 9.50E+05         | 4.68E+05                      | 49.3                                 |
| 23              | 1.60E+04         | 3.00E+02                      | 1.9                                  |
| 24              | 9.91E+04         | 8.80E+04                      | 88.8                                 |
| 25              | 6.00E+04         | 5.80E+04                      | 96.7                                 |
| 26              | 1.23E+05         | 3.55E+04                      | 29.0                                 |
| 27              | 5.55E+05         | 4.53E+04                      | 8.2                                  |
| 28              | 1.92E+05         | 1.96E+05                      | 102.4                                |
| 29              | 4.66E+05         | 3.11E+05                      | 66.7                                 |
| 30              | 1.10E+05         | 6.71E+04                      | 61.0                                 |
| 31              | 1.16E+06         | 2.28E+05                      | 19.7                                 |
| 32              | 2.72E+05         | 1.84E+05                      | 67.6                                 |
| 33              | 2.73E+05         | 1.09E+05                      | 40.0                                 |
| 34              | 1.25E+05         | 8.10E+04                      | 64.8                                 |
| 35              | 1.07E+05         | 1.87E+04                      | 17.5                                 |
| 36              | 8.30E+04         | 2.25E+04                      | 27.1                                 |
| 37              | 9.82E+04         | 2.04E+04                      | 20.8                                 |
| 38              | 3.00E+04         | 3.20E+03                      | 10.7                                 |
| 39              | 1.40E+05         | 2.09E+04                      | 14.9                                 |
| 40              | 3.20E+04         | 1.20E+03                      | 3.8                                  |
| 41              | 6.70E+04         | 1.79E+04                      | 26.7                                 |

| <b>Raw milk sample</b> | <b>Total cell count</b> | <b><i>Pseudomonas</i><br/>cell count</b> | <b><i>Pseudomonas</i> / total count<br/>[%]</b> |
|------------------------|-------------------------|------------------------------------------|-------------------------------------------------|
| 42                     | 2.06E+05                | 1.35E+04                                 | 6.6                                             |
| 43                     | 2.00E+06                | 3.21E+04                                 | 1.6                                             |
| 44                     | 2.30E+04                | 8.00E+02                                 | 3.5                                             |
| 45                     | 3.45E+05                | 8.10E+03                                 | 2.4                                             |
| 46                     | 1.07E+05                | 1.18E+04                                 | 11.0                                            |
| 47                     | 2.82E+04                | 4.20E+03                                 | 14.9                                            |
| 48                     | 1.80E+04                | 3.00E+03                                 | 16.7                                            |
| 49                     | 6.20E+04                | 2.75E+04                                 | 44.3                                            |
| 50                     | 5.40E+04                | 5.60E+03                                 | 10.4                                            |
| 51                     | 2.30E+04                | 5.55E+03                                 | 24.1                                            |
| 52                     | 2.40E+04                | 2.60E+03                                 | 10.8                                            |
| 53                     | 3.00E+04                | 4.50E+03                                 | 15.0                                            |
| 54                     | 2.30E+04                | 1.50E+03                                 | 6.5                                             |
| 55                     | 2.50E+04                | 9.00E+02                                 | 3.6                                             |
| 56                     | 2.28E+05                | 9.18E+03                                 | 4.0                                             |
| 57                     | 2.00E+04                | 6.00E+02                                 | 3.0                                             |
| 58                     | 1.60E+04                | 2.20E+03                                 | 13.8                                            |
| 59                     | 2.90E+04                | 2.10E+03                                 | 7.2                                             |
| 60                     | 6.30E+04                | 6.00E+02                                 | 1.0                                             |
